# Supplementary material for: Effect of Platelet Rich Plasma versus Saline Solution as a Preservation Solution for Hair Transplantation
Source: PubMed Central journal article supplement — Plast Reconstr Surg Glob Open. 2020 Jun 25;8(6):e2875. doi: 10.1097/GOX.0000000000002875 (PMC7339188; doi:10.1097/gox.0000000000002875), 2020-06-25

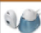

After remove X100 light delivery cap from Camera and take the whole of head like a right picture.

## Alopecia

## Hair Loss Type

- No Alopecia  
 Typical Alopecia  Alopecia in Crown Area  Alopecia in Frontal Area

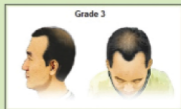

more hairy stage is genetic, anagenetic, anaplastic hair regrowth.  
 Two sides of the triangular hairlines between the frontal and temporal areas have receded deeper, exceeding 2 cm ahead of coronal plane between the external auditory

Description

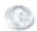

Install X100 cap in Camera (Installed X100 lens)

## Scalp Analysis

## Hair Intensity Analysis

Unit Size: [ 3.7mm X 2.8mm ]

Zoom 200%

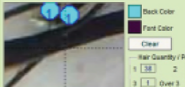

Number of Normal Hair: More than 5.

Image 1: 0

Image 2: 57

Image 3: 0

Image 4: 0

The average number of your hairs 57 Number

## Reference Images for Hair Scalp Type

Reference

## Reference Images for Pore Status

- Very clean  
 Clean but needs some cares  
 Needs a regular treatment  
 Needs an intensive treatment  
 Needs a professional advice and treatment

Save

Total Results

Close

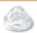

Install X400 cap in Camera (Installed X400 lens)

## Hair Analysis

## Hair Thickness Measurement

 400x  600x

Normal Hair Thickness: 0.05 mm - 0.15 mm

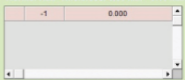

Average Hair Thickness: 0 mm

## Reference Images for Hair Type

Reference

## Reference Images for Cuticle Status

- Very healthy  
 Healthy but needs some cares  
 Needs a regular treatment  
 Needs an intensive treatment  
 Needs a professional advice and treatment

Save

Total Results

Close

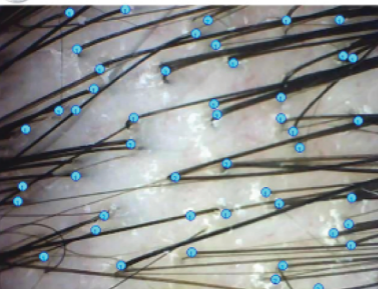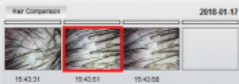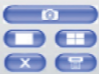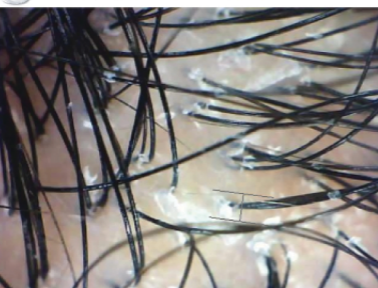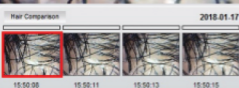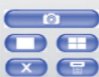

Supplement: gox-8-e2875-s001.pdf [file gox-8-e2875-s001.pdf]
