# Supplementary figures and images for: Effect of Platelet Rich Plasma versus Saline Solution as a Preservation Solution for Hair Transplantation
Source: PubMed Central journal article supplement — Plast Reconstr Surg Glob Open. 2020 Jun 25;8(6):e2875. doi: 10.1097/GOX.0000000000002875 (PMC7339188; doi:10.1097/gox.0000000000002875), 2020-06-25

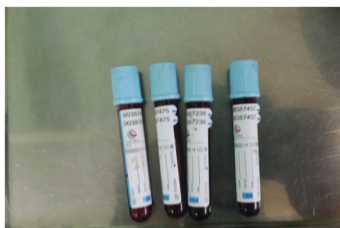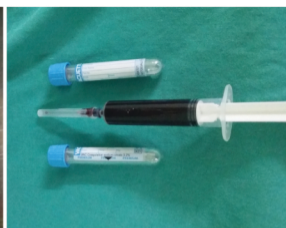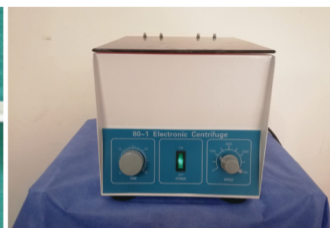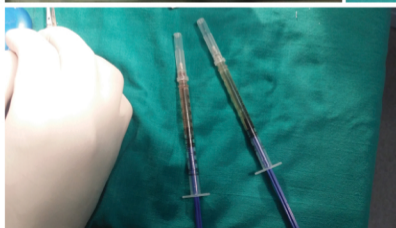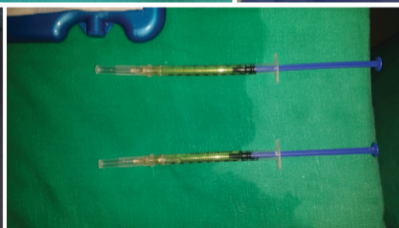

Supplement: gox-8-e2875-s002.pdf [file gox-8-e2875-s002.pdf]
